# Supplementary material for: A Preconception Paternal Fish Oil Diet Prevents Toxicant-Driven New Bronchopulmonary Dysplasia in Neonatal Mice
Source: MDPI journal article supplement (doi:10.3390/toxics10010007), 2021-12-27
Supplement: s1 [file s1]

# Supplementary Materials: A Preconception Paternal Fish Oil Diet Prevents Toxicant-Driven New Bronchopulmonary Dysplasia in Neonatal Mice

Jelonia T. Rumph, Kayla J. Rayford, Victoria R. Stephens, Sharareh Ameli, Pius N. Nde, Kevin G. Osteen and Kaylon L. Bruner-Tran

**Table S1.** *p*-values representing differences in growth curve measurements between groups. CT, Control; FO, Fish oil.

| Day 7                        | Growth Curve <i>p</i> -values |
|------------------------------|-------------------------------|
| CT vs. CT Formula            | >0.9999                       |
| CT vs. CT + FO               | 0.5393                        |
| CT vs. CT + FO + Formula     | 0.5393                        |
| CT vs. F2TCDD                | >0.9999                       |
| CT vs. F2TCDD + FO           | 0.9649                        |
| CT vs. F2TCDD + Formula      | 0.1541                        |
| CT vs. F2TCDD + FO + Formula | 0.1541                        |
| Day 8                        |                               |
| CT vs. CT Formula            | >0.9999                       |
| CT vs. CT + FO               | 0.5393                        |
| CT vs. CT + FO + Formula     | 0.5393                        |
| CT vs. F2TCDD                | 0.9649                        |
| CT vs. F2TCDD + FO           | >0.9999                       |
| CT vs. F2TCDD + Formula      | 0.1541                        |
| CT vs. F2TCDD + FO + Formula | 0.5393                        |
| Day 9                        |                               |
| CT vs. CT Formula            | >0.9999                       |
| CT vs. CT + FO               | 0.9649                        |
| CT vs. CT + FO + Formula     | 0.9649                        |
| CT vs. F2TCDD                | 0.9649                        |
| CT vs. F2TCDD + FO           | 0.5393                        |
| CT vs. F2TCDD + Formula      | >0.9999                       |

|                              |        |
|------------------------------|--------|
| CT vs. F2TCDD + FO + Formula | 0.5393 |
| <b>Day 10</b>                |        |
| CT vs. CT + FO               | 0.9649 |
| CT vs. CT + Formula          | 0.5393 |
| CT vs. CT + FO + Formula     | 0.5393 |
| CT vs. F2TCDD                | 0.1541 |
| CT vs. F2TCDD + FO           | 0.5393 |
| CT vs. F2TCDD + Formula      | 0.9649 |
| CT vs. F2TCDD + FO + Formula | 0.5393 |

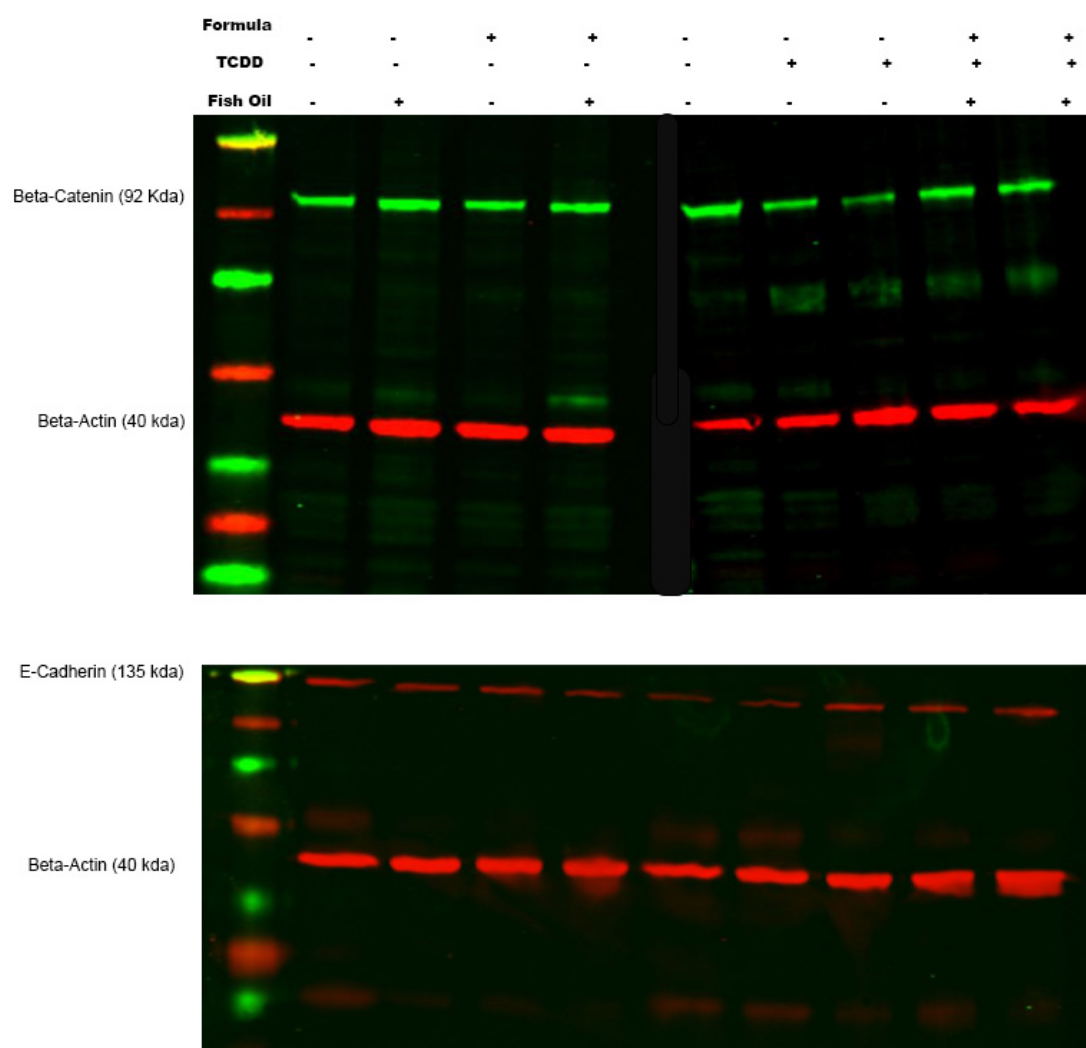

Figure S1. Full immunoblot.
